# Supplementary material for: Correlated Light-Serial Scanning Electron Microscopy (CoLSSEM) for ultrastructural visualization of single neurons in vivo
Source: PubMed Central journal article supplement (PMC6160427; doi:10.1038/s41598-018-32820-5), 2018-09-27
Supplement: 41598_2018_32820_MOESM1_ESM.pdf [file 41598_2018_32820_MOESM1_ESM.pdf]

## Supplemental Figure

Correlated Light-Serial Scanning Electron Microscopy (CoLSSEM)  
for ultrastructural visualization of single neurons *in vivo*

Yusuke Hirabayashi<sup>1,2,3,4</sup>, Juan Carlos Tapia<sup>1,5\*</sup> and Franck Polleux<sup>1,2,3\*</sup>

<sup>1</sup> Columbia University Medical Center - Department of Neuroscience

<sup>2</sup> Mortimer B. Zuckerman Mind Brain Behavior Institute

<sup>3</sup> Kavli Institute for Brain Science

<sup>4</sup> JST, PRESTO

550 W. 120th Street, Northwest Corner Building #1104, New York, NY 10027

<sup>5</sup> University of Talca, Talca, Chile – Department of Health Sciences

\* Co-corresponding authors:

Franck Polleux, Ph.D.  
Columbia University  
Department of Neuroscience  
Mortimer B. Zuckerman Mind Brain Behavior Institute  
Kavli Institute for Brain Science

1108 NWC Building - MC 4862  
550 West 120th Street  
New York, N.Y. 10027  
[fp2304@cumc.columbia.edu](mailto:fp2304@cumc.columbia.edu)

Tel: 212-853-0407

Juan Carlos Tapia, Ph.D.  
University of Talca  
Department of Health Sciences  
Avda. Lircay S/N  
Talca, Chile 3460000  
[juantapia@utalca.cl](mailto:juantapia@utalca.cl)

Tel: 56-712-418855 extension 2855

## **Legends for supplementary figure and movies**

**Figure S1.** Serial coronal vibratome slices (100 microns thick) of adult mouse brain following sparse, Cre-dependent, *in utero* cortical electroporation. Individual optically-isolated Venus-expressing pyramidal neurons in layer 2-3 were indicated with arrows. 15 neurons in this brain were suitable for CoLSSEM.

## **Figure S2. Tracing of non-labeled and labeled spines**

Serial electron micrographs obtained with ATUM-SEM (A and B) and tracing of corresponding dendritic segment (A' and B') of unlabeled (A and A') and AVC(DAB)-labeled (B and B') dendritic segment. Arrowheads indicate discontinuous spine necks that in the Apex2-labeled segment helps disambiguate the small fragments of that spine (B-B').

**Movie S1.** Related to Figure 1E. Low magnification, 3D rotating projection of confocal stack of single cortical pyramidal neuron in layer 2/3 expressing CAAX-mVenus-Apex, imaged at P21.

**Movie S2.** Related to Figure 1E. High magnification and high resolution confocal imaging of a single dendritic branch of pyramidal neuron in layer 2/3 showing single dendritic spines.

**Movie S3.** Related to Figure 4. 3D reconstruction of the apical dendrite of a pyramidal neuron imaged by CoLSSEM, 3D SEM shown in Figure 4.

**Movie S4.** Related to Figure 5. Low magnification, 3D rotating projection of confocal stack of single cortical pyramidal neuron in layer 2/3 expressing CAAX-mVenus-Apex, imaged at P21. The axon segment of this neuron is imaged by 3D SEM in Figure 5.

**Movie S5.** Related to Figure 5. Raw image series used for 3D SEM of axon segment reconstructed in Figure 5.

**Movie S6.** Related to Figure 5. Annotated image series used for 3D SEM of axon segment reconstructed in Figure 5. The axon segment from neuron reconstructed in Figure 4 is outlined in blue.

**Movie S7.** Related to Figure 5. 3D animation of the axon segment imaged by CoLSSEM and traced in Figure 5 (also shown in Movies S5&S6).

**Movie S8.** Related to Figure 5. 3D animation of the axon segment (blue) imaged by CoLSSEM and traced in Figure 4 focusing on the presynaptic terminal labeled with the genetically encoded vGlut1-mCherry (inset of Figure 5A). The post-synaptic partner of this presynaptic bouton is shown in yellow.

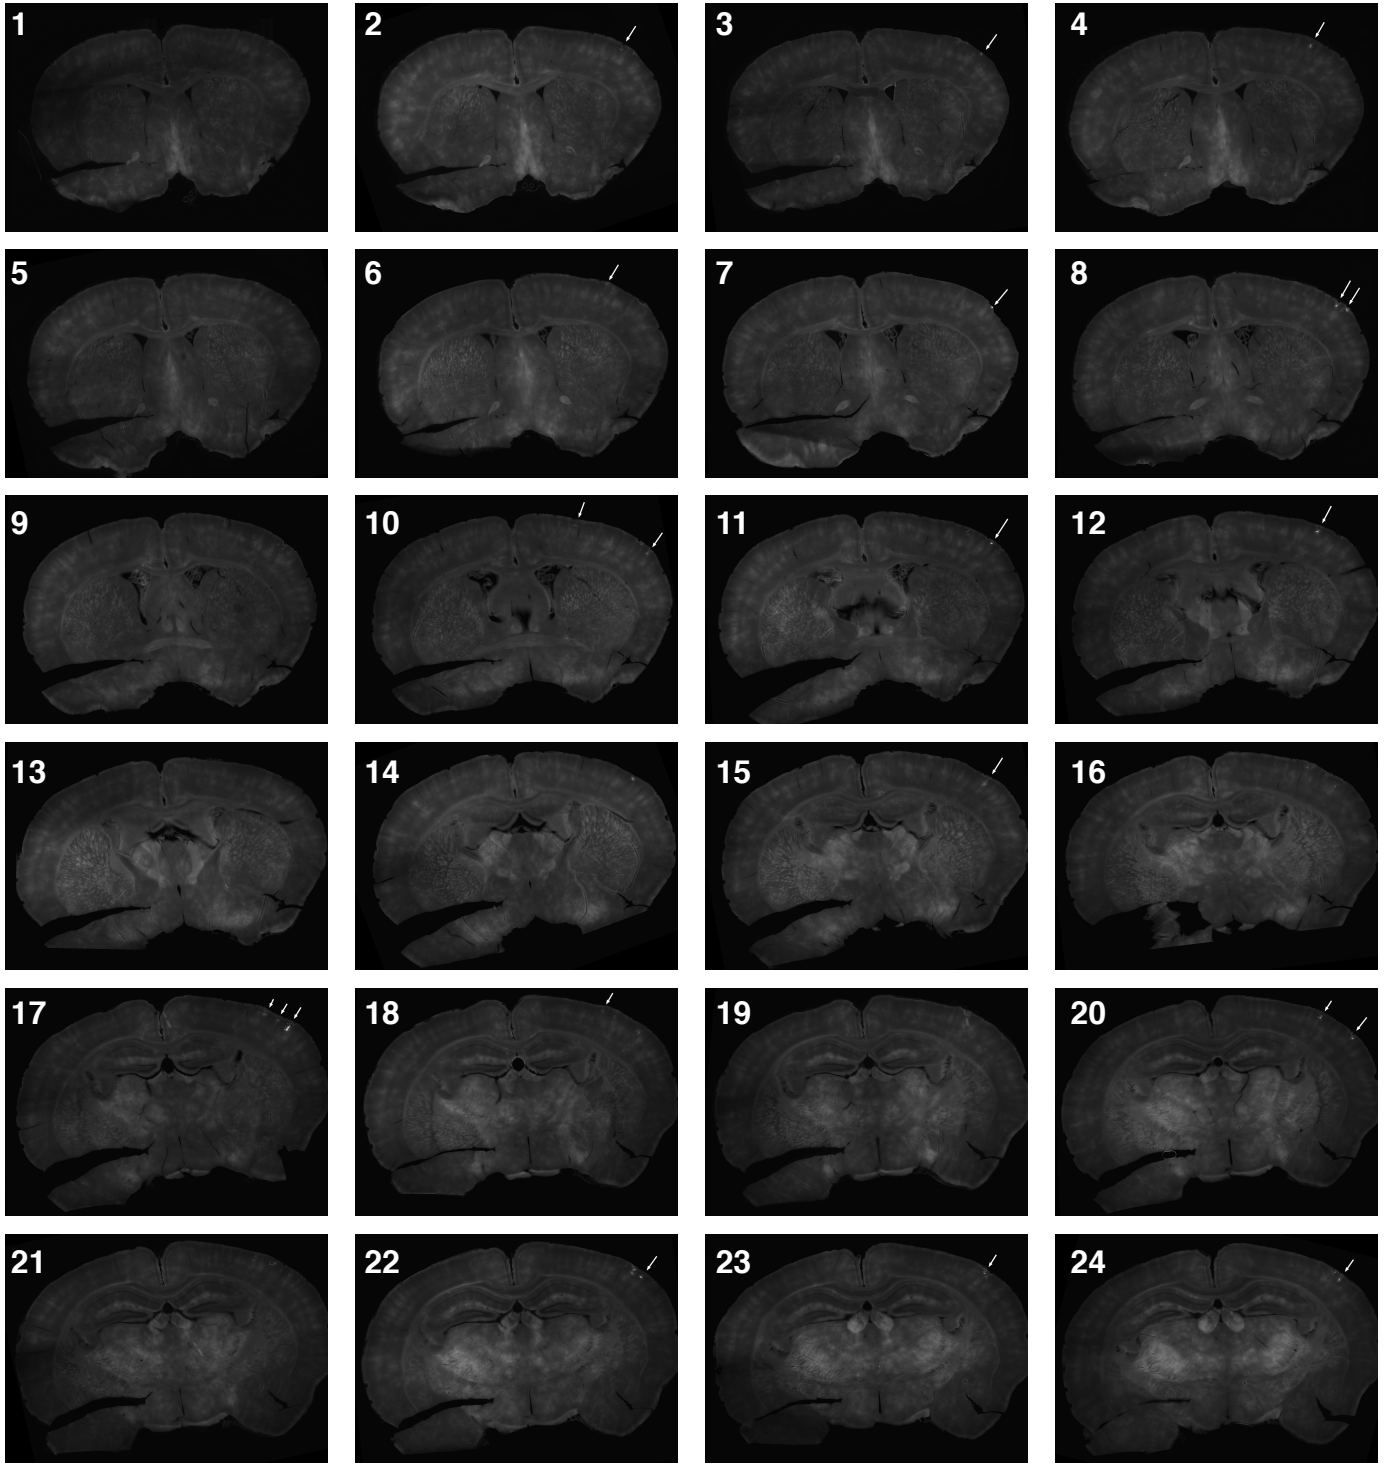

Supplemental Figure 1 - Hirabayashi et al.

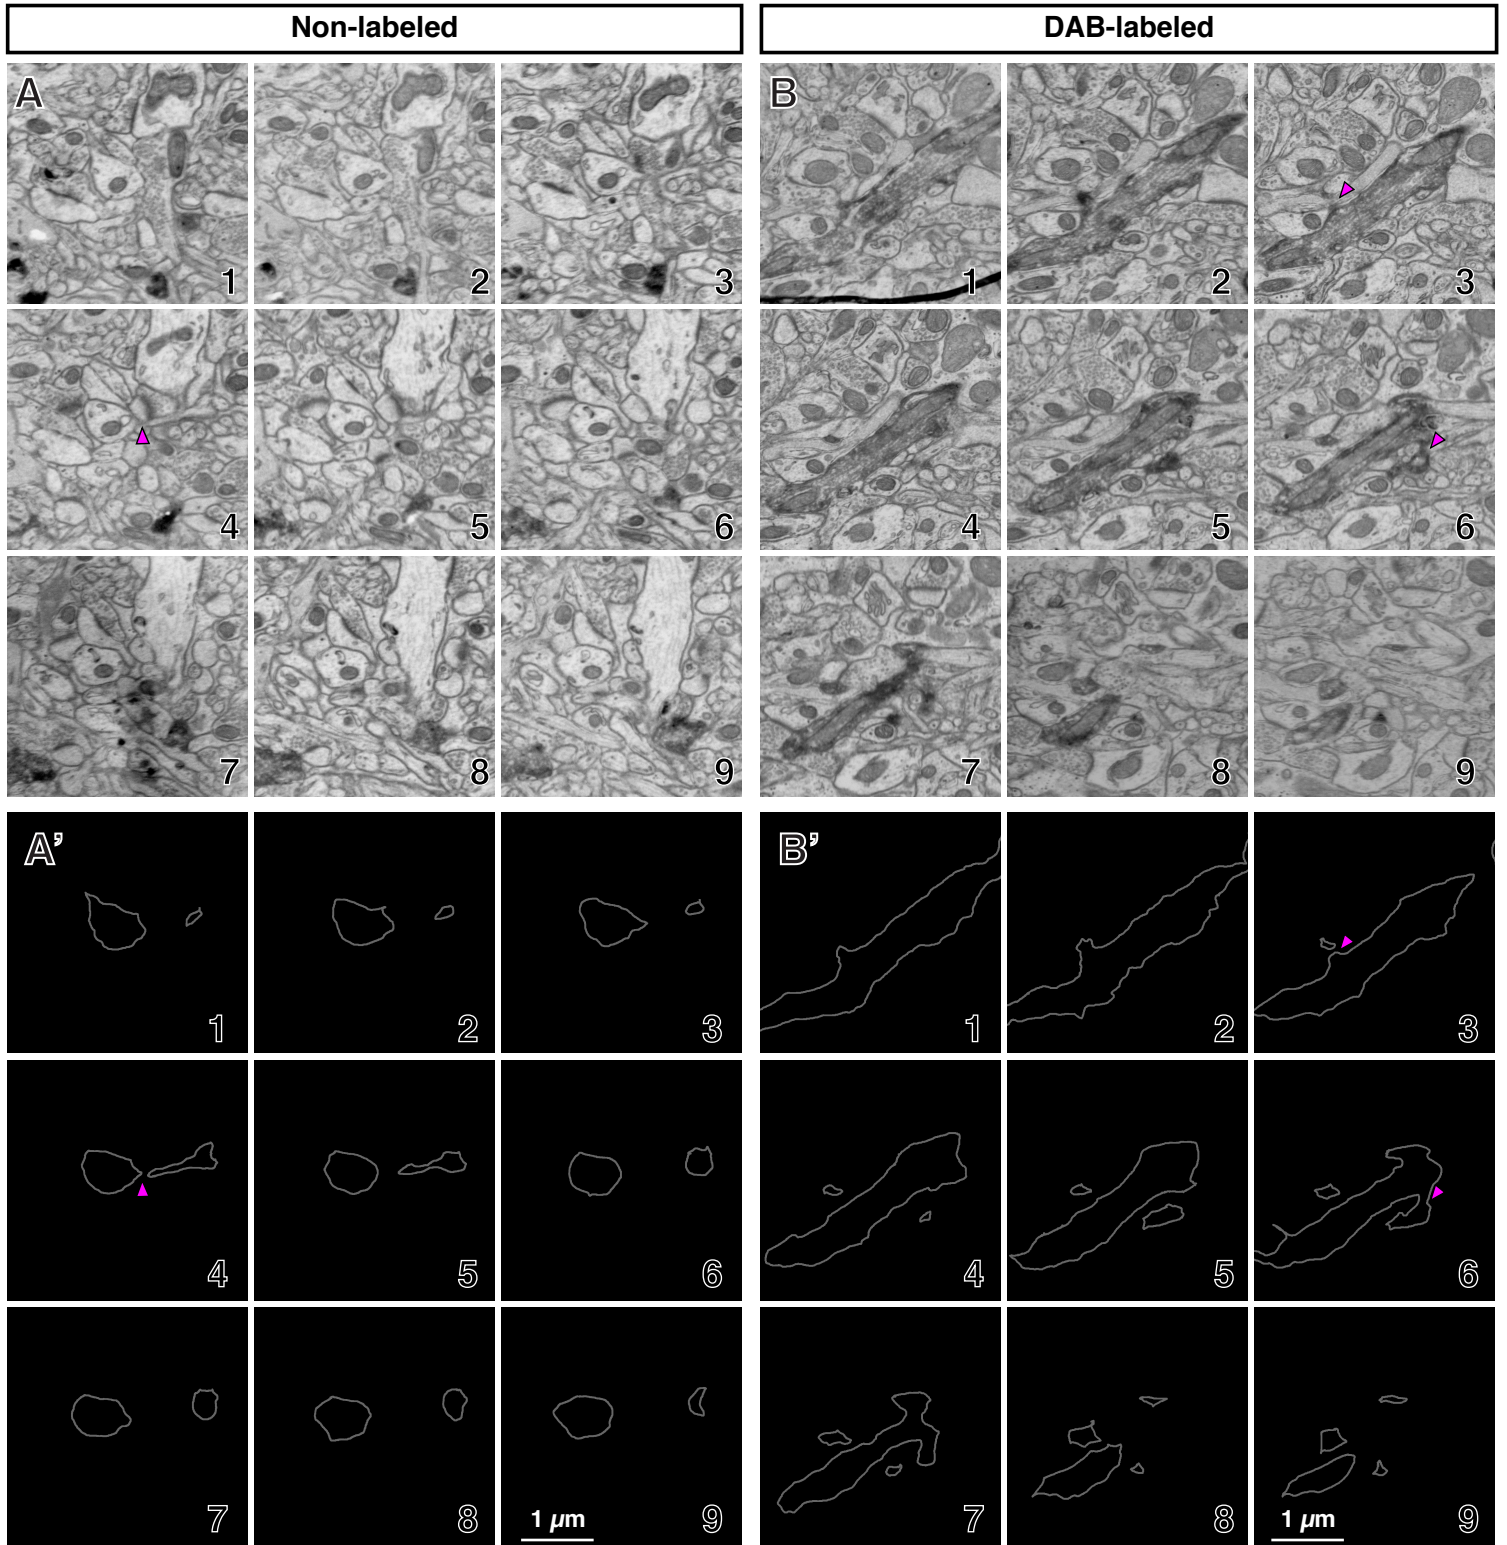

Supplemental Figure 2 - Hirabayashi et al.
